# Supplementary material for: Phytoplankton growth and consumption by microzooplankton stimulated by turbulent nitrate flux suggest rapid trophic transfer in the oligotrophic Kuroshio
Source: Copernicus journal article supplement (doi:10.5194/bg-17-2441-2020), 2020-05-06
Supplement: Supplementary file 1 [file bg-17-2441-2020-supplement.pdf]

Supplement of Biogeosciences, 17, 2441–2452, 2020  
<https://doi.org/10.5194/bg-17-2441-2020-supplement>  
© Author(s) 2020. This work is distributed under  
the Creative Commons Attribution 4.0 License.

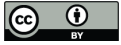

*Supplement of*

## **Phytoplankton growth and consumption by microzooplankton stimulated by turbulent nitrate flux suggest rapid trophic transfer in the oligotrophic Kuroshio**

**Toru Kobari et al.**

*Correspondence to:* Toru Kobari (kobari@fish.kagoshima-u.ac.jp)

The copyright of individual parts of the supplement might differ from the CC BY 4.0 License.

1

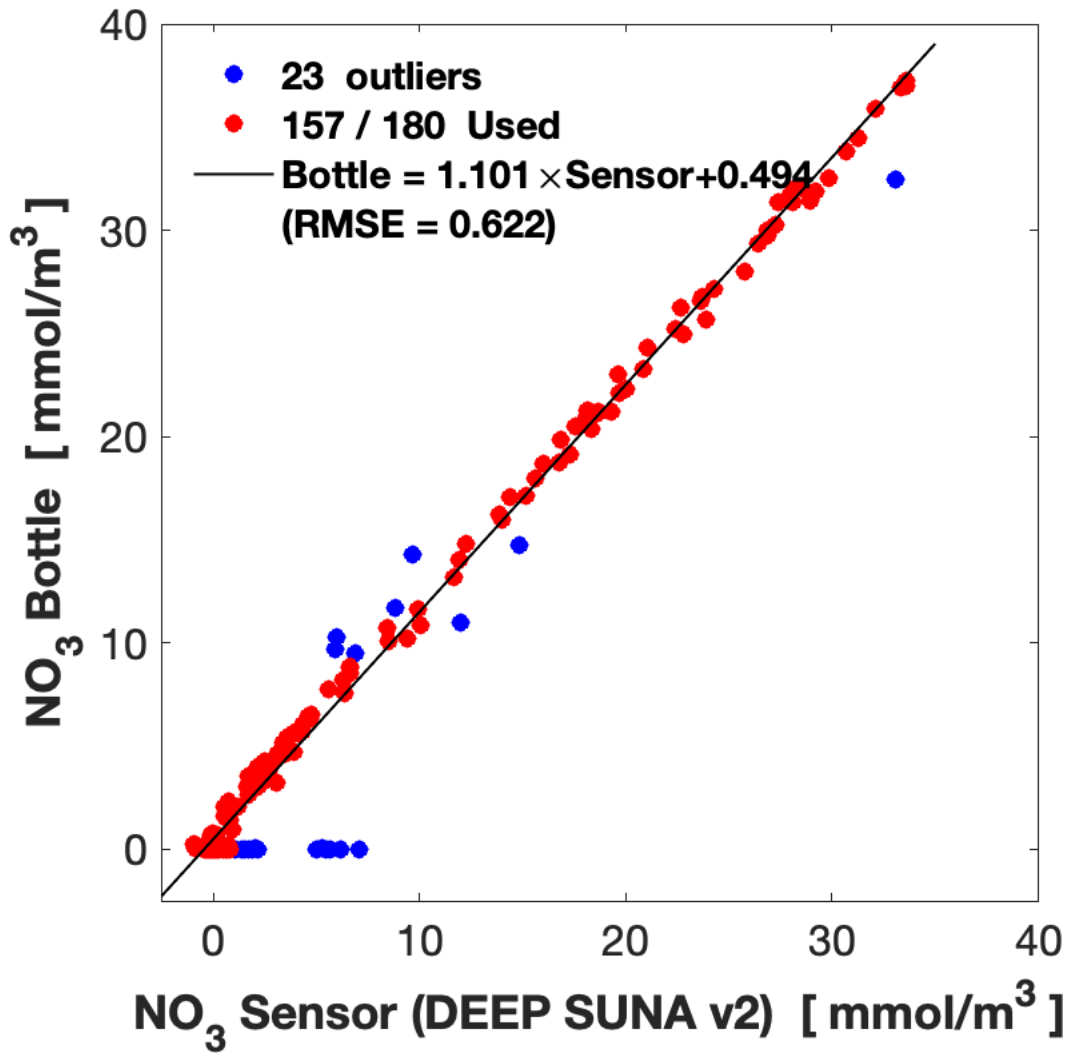

2

3

4 **Supplement Figure 1** In situ nitrate measurements by Deep SUNA V2 plotted against the laboratory water analysis  
5 results from bottle sampled water during cruise KG1515 of T/S *Kagoshima-maru*. For obtaining the regression line used  
6 for the sensor calibration, we excluded outlier data in which the absolute value of the difference between the data and  
7 regression line exceeded 2.2 times the RMSE.

8

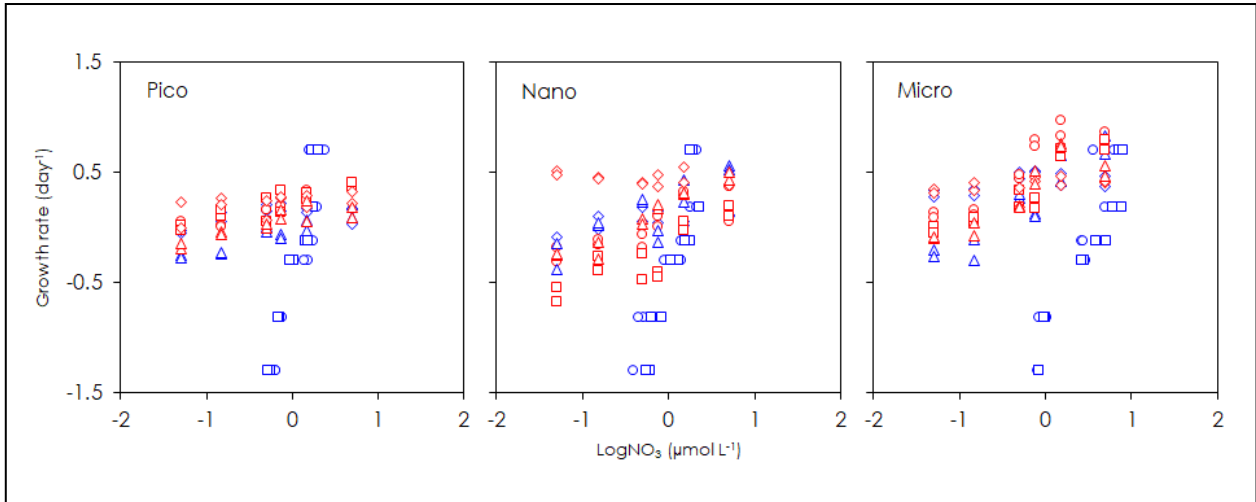

9

10 **Supplement Figure 2** Relationship of phytoplankton growth rates to logarithmically transformed concentrations of  
11 enriched nitrate. Blue and red circles mean the stations in the upstream and downstream Kuroshio in the Tokara Strait,  
12 respectively. Pico: chlorophyll smaller than 2 μm. Nano: chlorophyll between 2 and 11 μm. Micro: chlorophyll larger  
13 than 11 μm.

14
